# Supplementary material for: Reinforcement Learning-Augmented ProteinMPNN Improve the Binding Affinity of TNFR1-Targeting Minibinders
Source: Research Square preprint supplement (doi:10.21203/rs.3.rs-8645836/v1), 2026-01-21
Supplement: Supplementary file 1 [file 3ec0866747171e1fd6a4d7b1.docx]

Supplementary information

# **Reinforcement Learning-Augmented ProteinMPNN Improve the Binding Affinity of TNFR1-Targeting Minibinders**

Lin Weia,b,c,1, Zhiyong Wua,c,1, Yang Hua,c,1, Yihe Fanga,c,1, Miaomiao Genga,c, Banbin Xinga,c, Jun Wenga,c,d,*, Song Liua, Ke Minga,b,c, Zigong Weia,b,c,*

aState Key Laboratory of Biocatalysis and Enzyme Engineering, School of Life Sciences, Hubei University, Wuhan, Hubei 430062, China

bNational & Local Joint Engineering Research Center of High-throughput Drug Screening Technology, School of Life Sciences, Hubei University, Wuhan, Hubei 430062, China

cAnimal Innovative Drug Research Center, School of Life Sciences, Hubei University, Wuhan, Hubei, PR China

dKey Laboratory of Molecular Biophysics of Ministry of Education, College of Life Science and Technology, Huazhong University of Science and Technology, Wuhan, Hubei 430074, China

*Corresponding authors. Tel: +86-27-88661237. E-mail: [weizigong@163.com](mailto:weizigong@163.com); weizigong@hubu.edu.cn.

1These authors contributed equally to this work.

**Part I. Figures.**


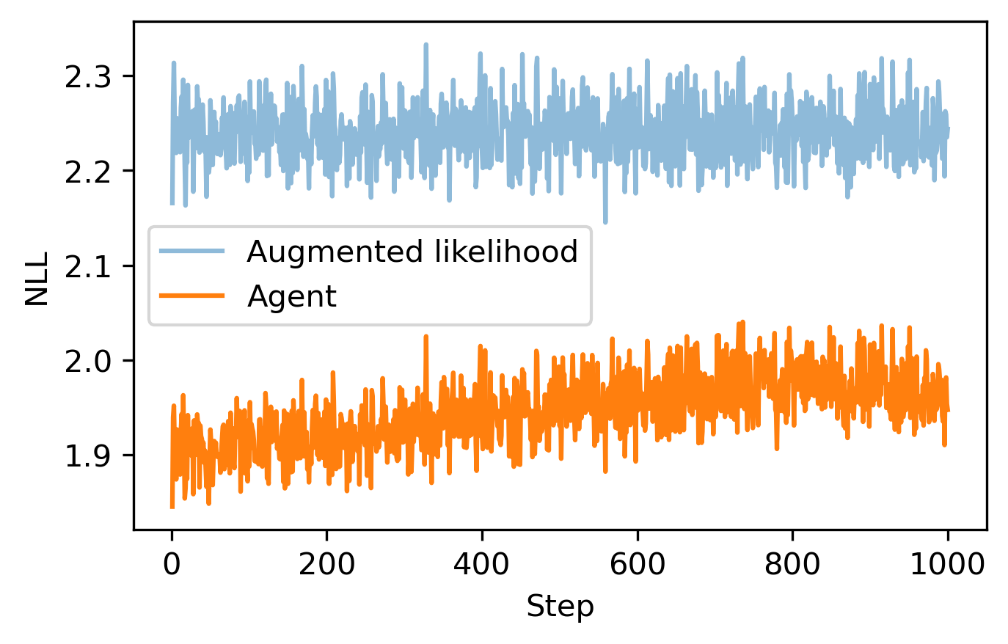


**Fig. S1**. The NLL curves of the augmented likelihood and “Agent”.


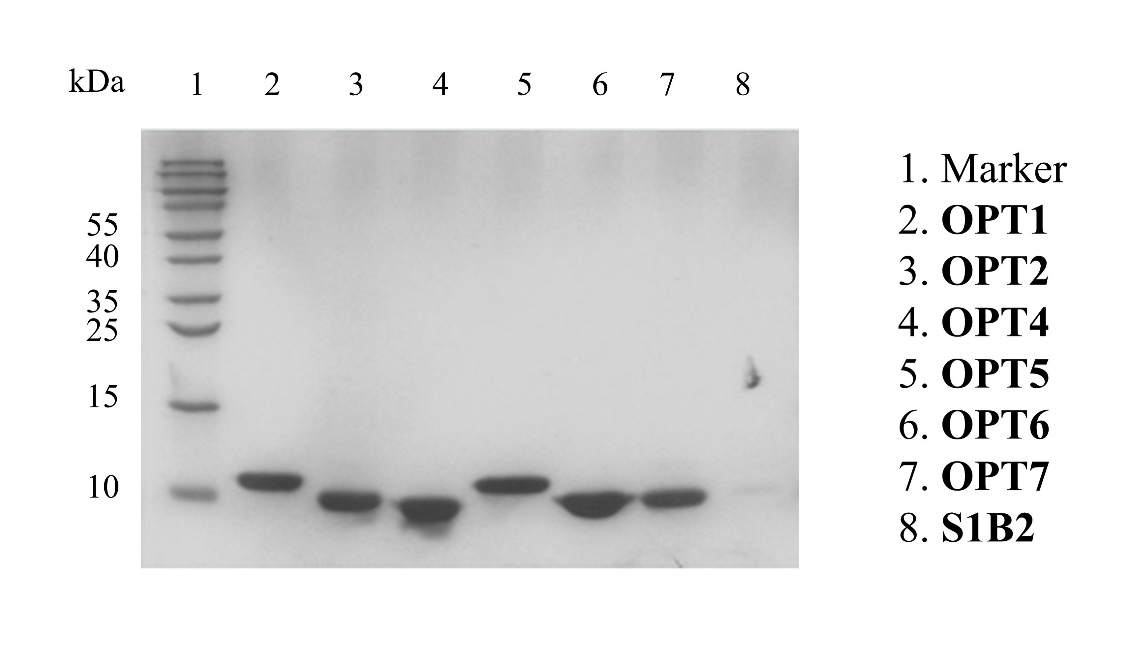


**Fig. S2.** SDS-PAGE confirming the expression and purification of **OPT1, OPT2, OPT4-OPT7**, **S1B2**.

.


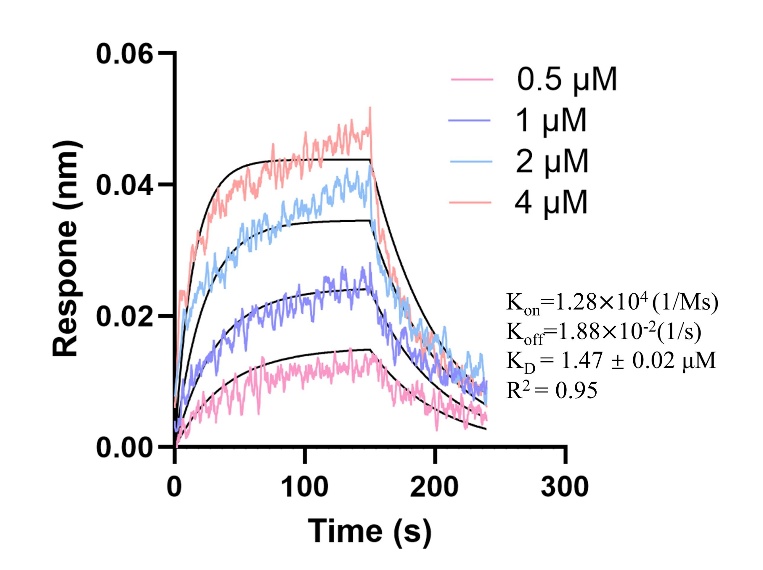


**Fig. S3**. The binding affinity of **S1B2** to human TNFR1 was determined using biolayer interferometry.


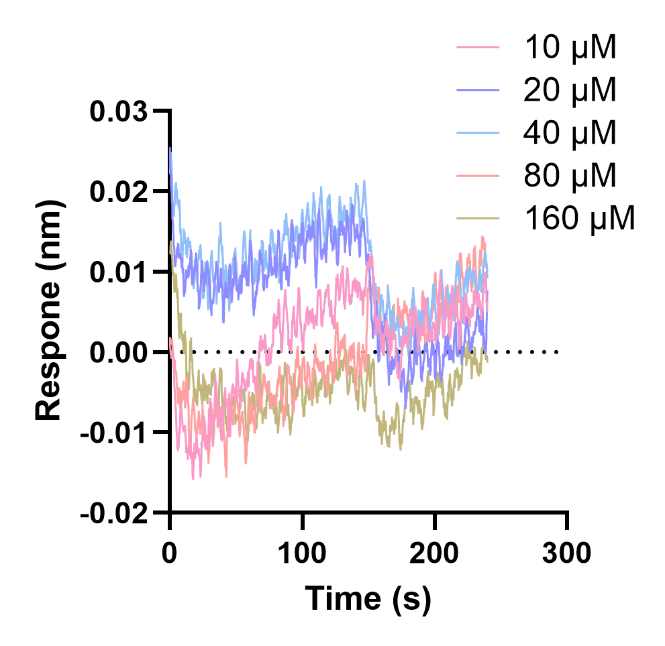


**Fig. S4**. The **OPT6** shows low binding affinity, determined by biolayer interferometry.

**Part II.** **Validation of the ability of ProAffinity-GNN to predict the pKD of minibinders.**

To validate the applicability of ProAffinity‑GNN for predicting the binding affinity of *de novo* designed minibinders with a triple‑helix fold, we performed a correlation analysis using publicly available data, which remain comparable limited for this class of proteins. We extracted 16 sequences and their experimentally measured comparable dissociation constants (KD) from the work of Berger et al. 1 (**Table S1**). The structures of these sequences were predicted using AF3, among which 13 exhibited a predicted local distance difference test (pLDDT) > 80, indicating high model confidence. For these 13 high‑confidence structures, the corresponding pKD values were predicted with ProAffinity‑GNN. Comparison between predicted and experimental pKD yielded a Pearson correlation (R) coefficient of 0.66, demonstrating a moderate correlation (**Fig. S5**). This result supports the reliability of ProAffinity‑GNN for estimating the relative binding affinity of *de novo* designed, triple‑helix minibinders.

**Fig. S5.**The correlation between pKD predicted by ProAffinity-GNN and the real pKD. The data was collected from Berger’s work.

**Table S1.** Details for the 16 sequences from the work of Berger et al. 1

| Name | Sequence | Real KD | real pKD | ProAffinity-GNN predicted pKd | pLDDT |
| --- | --- | --- | --- | --- | --- |
| 23R-10 | MEEEKYVRELVKKYYEKKLSQPEAVEEIRKYARKKGLEAWKLVWAFMELVKRNI | 370pM | 9.43 | 7.94 | 86.77 |
| 23R-15 | MEPEKYVREKVKKYYEGKLSQPEAVEEIRKYARKKGLEAWKLIWHFMQLVKRDI | 1nM | 9.00 | 7.88 | 86.47 |
| 23R-24 | NLWQIFYVLNTIYKRTGDPTAKKLNKALREALKKHDEKATKELAKKATKYIRS | 45pM | 10.35 | 8.13 | 86.39 |
| 23R-91 | PLWQVFYLLNTCIKRTGDPTCKKLAKALRECLKKGDLKACNELADKAVKYINS | <1pM | 12.00 | 8.31 | 86.31 |
| 23R-13 | MEEEKYVRELVKKYYEGKLSHQEAVVEIRKYARKKGLEAWKLVWMFMQLVKRNI | 650pM | 9.19 | 7.80 | 86.30 |
| 23R-22 | NLWVIFYLLNTIHKRTGDPTAKKLIKALDEAMKKGDEKATKELAKKALKYIRS | 350pM | 9.46 | 7.37 | 86.13 |
| 23R-2 | NLWQIFYQLSTILKRTGDPTAKKLLKALAEALKKGDEKALKELAKKATKYIRS | 34nM | 7.47 | 7.18 | 85.96 |
| 23R-19 | NLWQIFYILNTIHKRTGDPTAKKLPKALREAMKKGDEKAMKELAKKALKYIRS | 81nM | 7.09 | 7.69 | 85.53 |
| 23R-75 | NLWVIFYLLNTCIKRTGDPTCKKLKKALRECLKKGDEKACKELAKKAMKYIRS | 75pM | 10.12 | 9.23 | 85.25 |
| 17-2 | EPREEEAEKYIKRANGDYDLAELLAFLDGNAEIASAIVEYKER | 200nM | 6.70 | 7.32 | 83.74 |
| 17-35 | EPREEEAENYIKWAGGDYDLAELMAFLDGNAEAAVAIVRAKER | 3.3nM | 8.48 | 7.14 | 83.08 |
| 23R-1 | MESEKYLRELVKKYYEGKLSVQEAVEEVRKYARKKGLEAWMLTWMFMELVKRYI | 26nM | 7.59 | 7.67 | 82.74 |
| 17-1 | TWHIDVLAPPEVVKTAASQAGAEVHKAPGDWWRITTDDETAVDIVELILFIAGYQFHISSS | 51nM | 7.29 | 7.28 | 80.66 |
| 17-3 | TWHIDVKADPSIVKAAASAAGAEVHKLPGDKWRITVDDETAVDIVELILFIWGVEFHISSS | 47nM | 7.33 | 7.78 | 79.47 |
| 17-51 | EPREECVENYIKWAGGDYDLAELMAFLDGNAECAVAIVRAKER | 5.7nM | 8.24 | 6.85 | 69.29 |
| 17-53 | EPREECVENYIKWAGGDYDLAELMAFLDGNAECAVAIVRAKERLPASPASPASPASPASPASPASPASEPREECVENYIKWAGGDYDLAELMAFLDGNAECAVAIVRAKER | 10pM | 11.00 | 6.92 | 58.87 |

**References**

1. Berger, S. *et al.* Preclinical proof of principle for orally delivered Th17 antagonist miniproteins. *Cell* **187**, 1-13 (2024).
